# Supplementary material for: Identification of a New Antibacterial Sulfur Compound from Raphanus sativus Seeds
Source: Hindawi journal article supplement (doi:10.1155/2016/9271285), 2016-01-01

## Supplementary data

HRMS of fraction 2 demonstrating the calculated molecular mass (341.04) and the formula (C11, H19, N, O5, S3) of the compound.

**Single Mass Analysis**

Tolerance = 20.0 mDa / DBE: min = -1.5, max = 50.0

Element prediction: Off

Number of isotope peaks used for i-FIT = 3

Monoisotopic Mass, Odd and Even Electron Ions

48 formula(e) evaluated with 6 results within limits (all results (up to 1000) for each mass)

Elements Used:

C: 10-15 H: 17-20 N: 0-2 O: 0-6 S: 0-3

13-Jun-2013

cli\_5716p 169 (1.459) Cm (151:256-87:117)

Galileo Society  
TOF MS ES+  
7.40e+004

sample

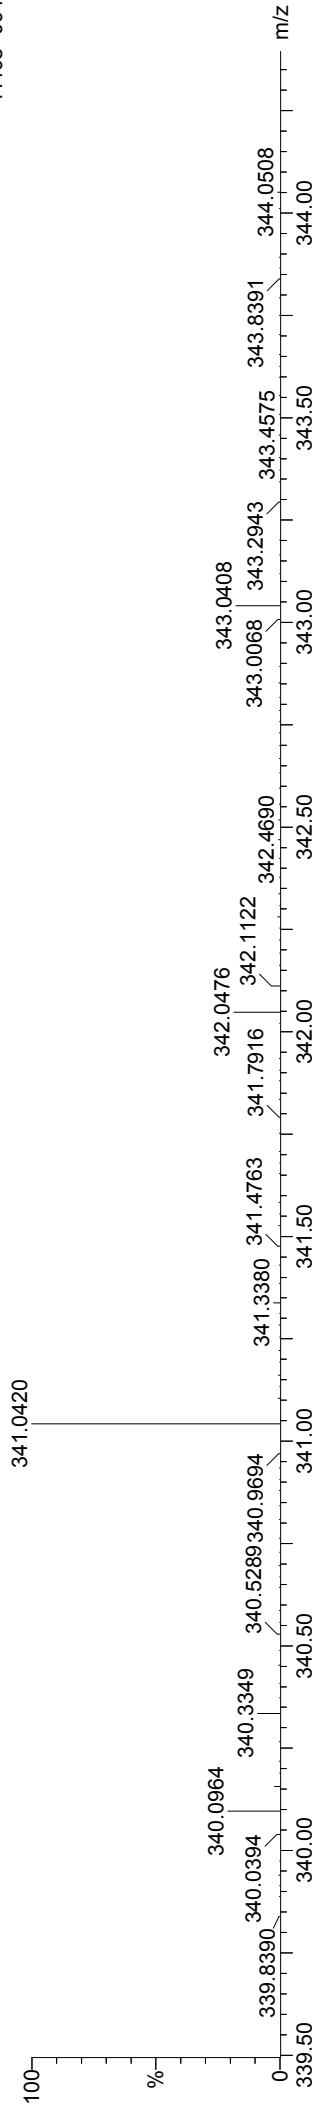

Minimum: -1.5  
Maximum: 50.0

| Mass     | Calc. Mass | mDa   | PPM   | DBE | i-FIT | Formula          |
|----------|------------|-------|-------|-----|-------|------------------|
| 341.0420 | 341.0425   | -0.5  | -1.5  | 3.0 | 233.3 | C11 H19 N O5 S3  |
|          | 341.0452   | -3.2  | -9.4  | 7.5 | 132.8 | C14 H17 N2 O2 S3 |
|          | 341.0340   | 8.0   | 23.5  | 7.5 | 283.8 | C15 H17 O3 S3    |
|          | 341.0517   | -9.7  | -28.4 | 7.5 | 972.8 | C15 H17 O5 S2    |
|          | 341.0300   | 12.0  | 35.2  | 3.5 | 716.0 | C10 H17 N2 O5 S3 |
|          | 341.0578   | -15.8 | -46.3 | 7.0 | 693.0 | C15 H19 N O2 S3  |

$^1\text{H}$ NMR of fraction 2

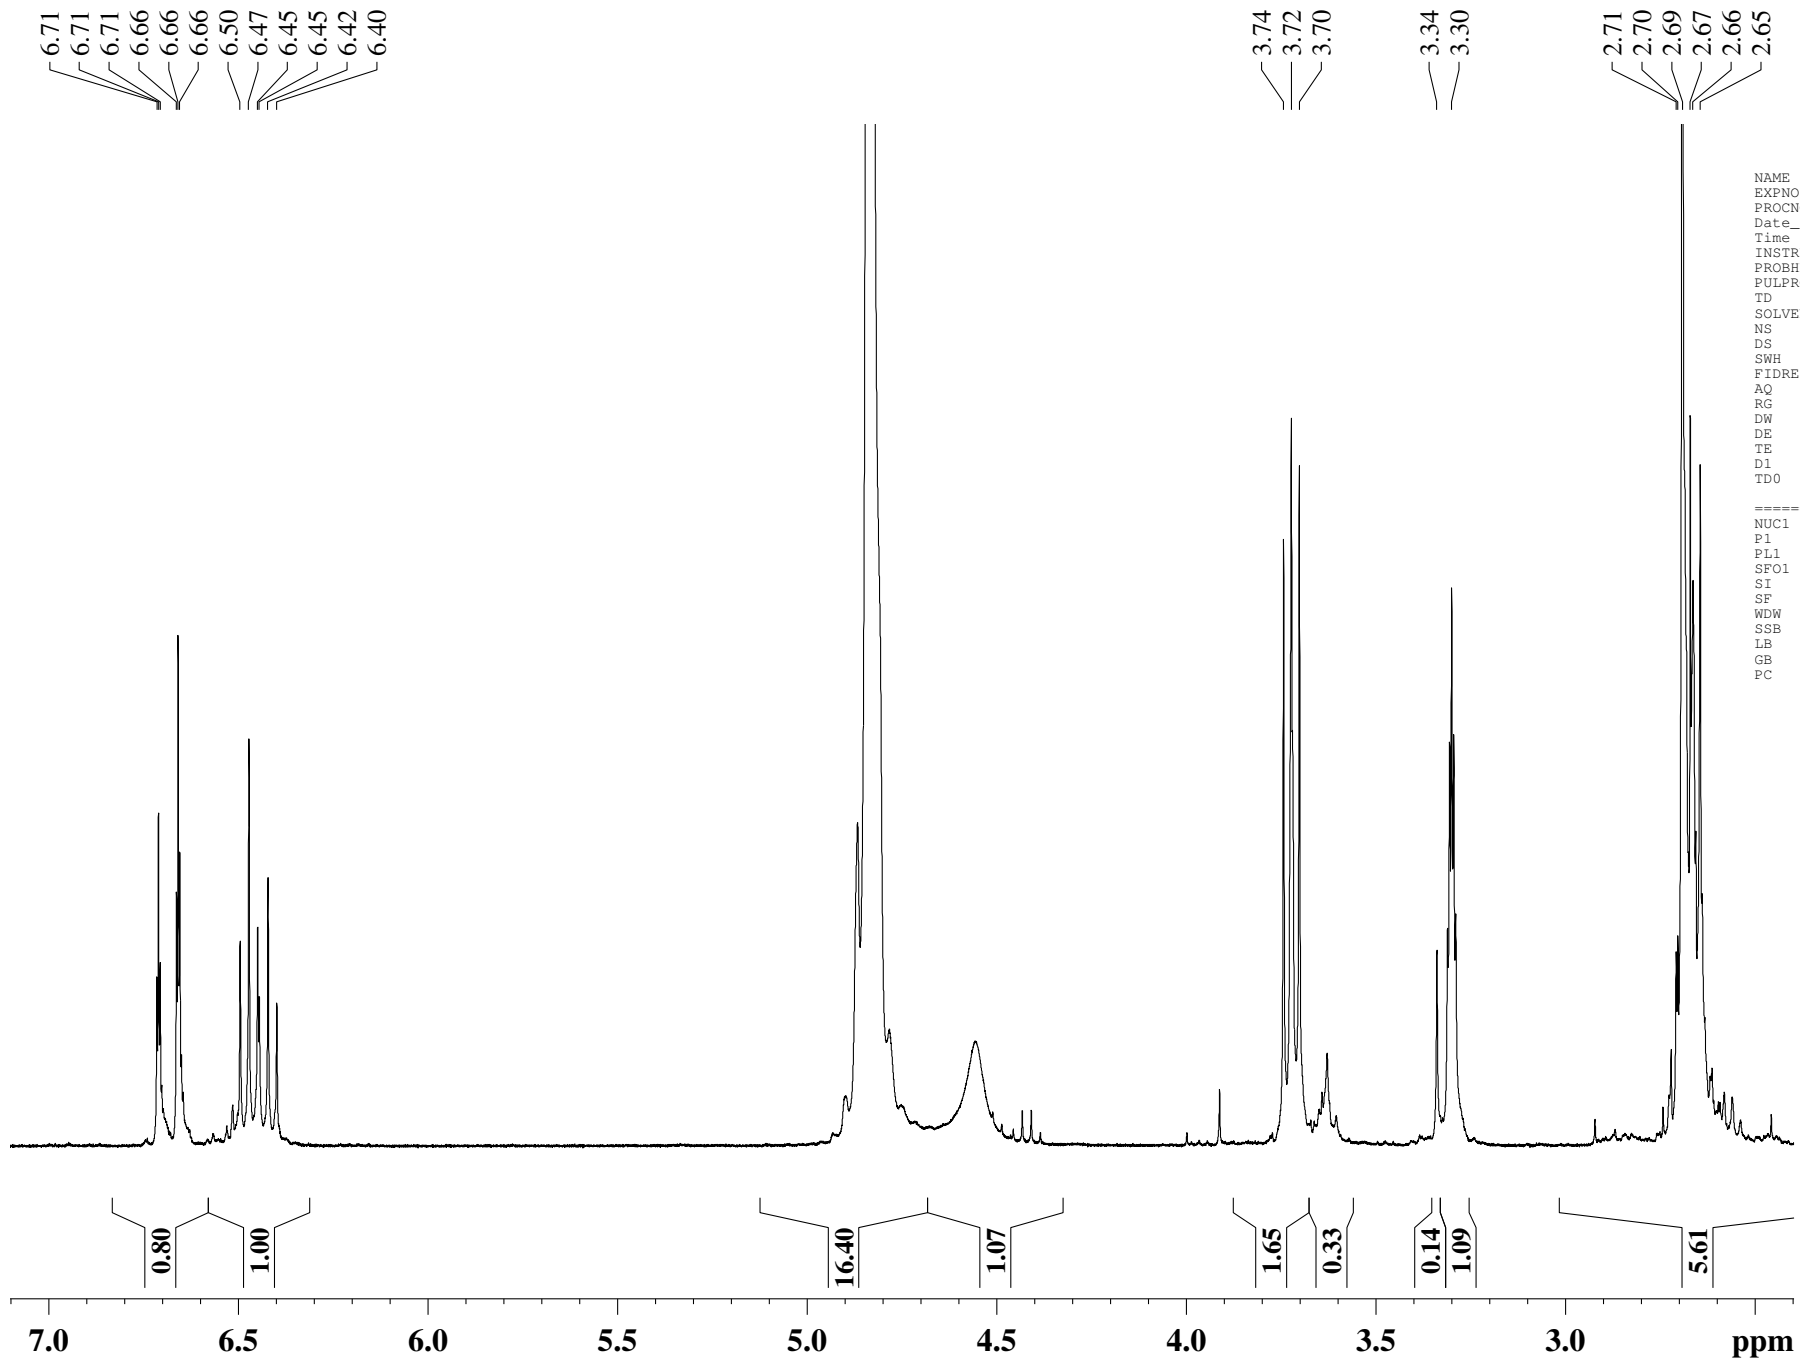

```

NAME      Metallotherapy
EXPNO     1
PROCNO    1
Date_     20120222
Time      12.50
INSTRUM   spect
PROBHD    5 mm QNP 1H/2
PULPROG   zg
TD         65536
SOLVENT   MeOD
NS         8
DS         0
SWH        4251.701 Hz
FIDRES     0.064876 Hz
AQ         7.7070837 sec
RG         90.5
DW         117.600 usec
DE         6.50 usec
TE         298.0 K
D1         3.00000000 sec
TDO        1

===== CHANNEL f1 =====
NUC1       1H
P1         12.60 usec
PL1        3.00 dB
SFO1       300.1313979 MHz
SI         131072
SF         300.1300077 MHz
WDW        no
SSB        0
LB         0.00 Hz
GB         0
PC         1.00
  
```

$^{13}\text{C}$ NMR of fraction 2

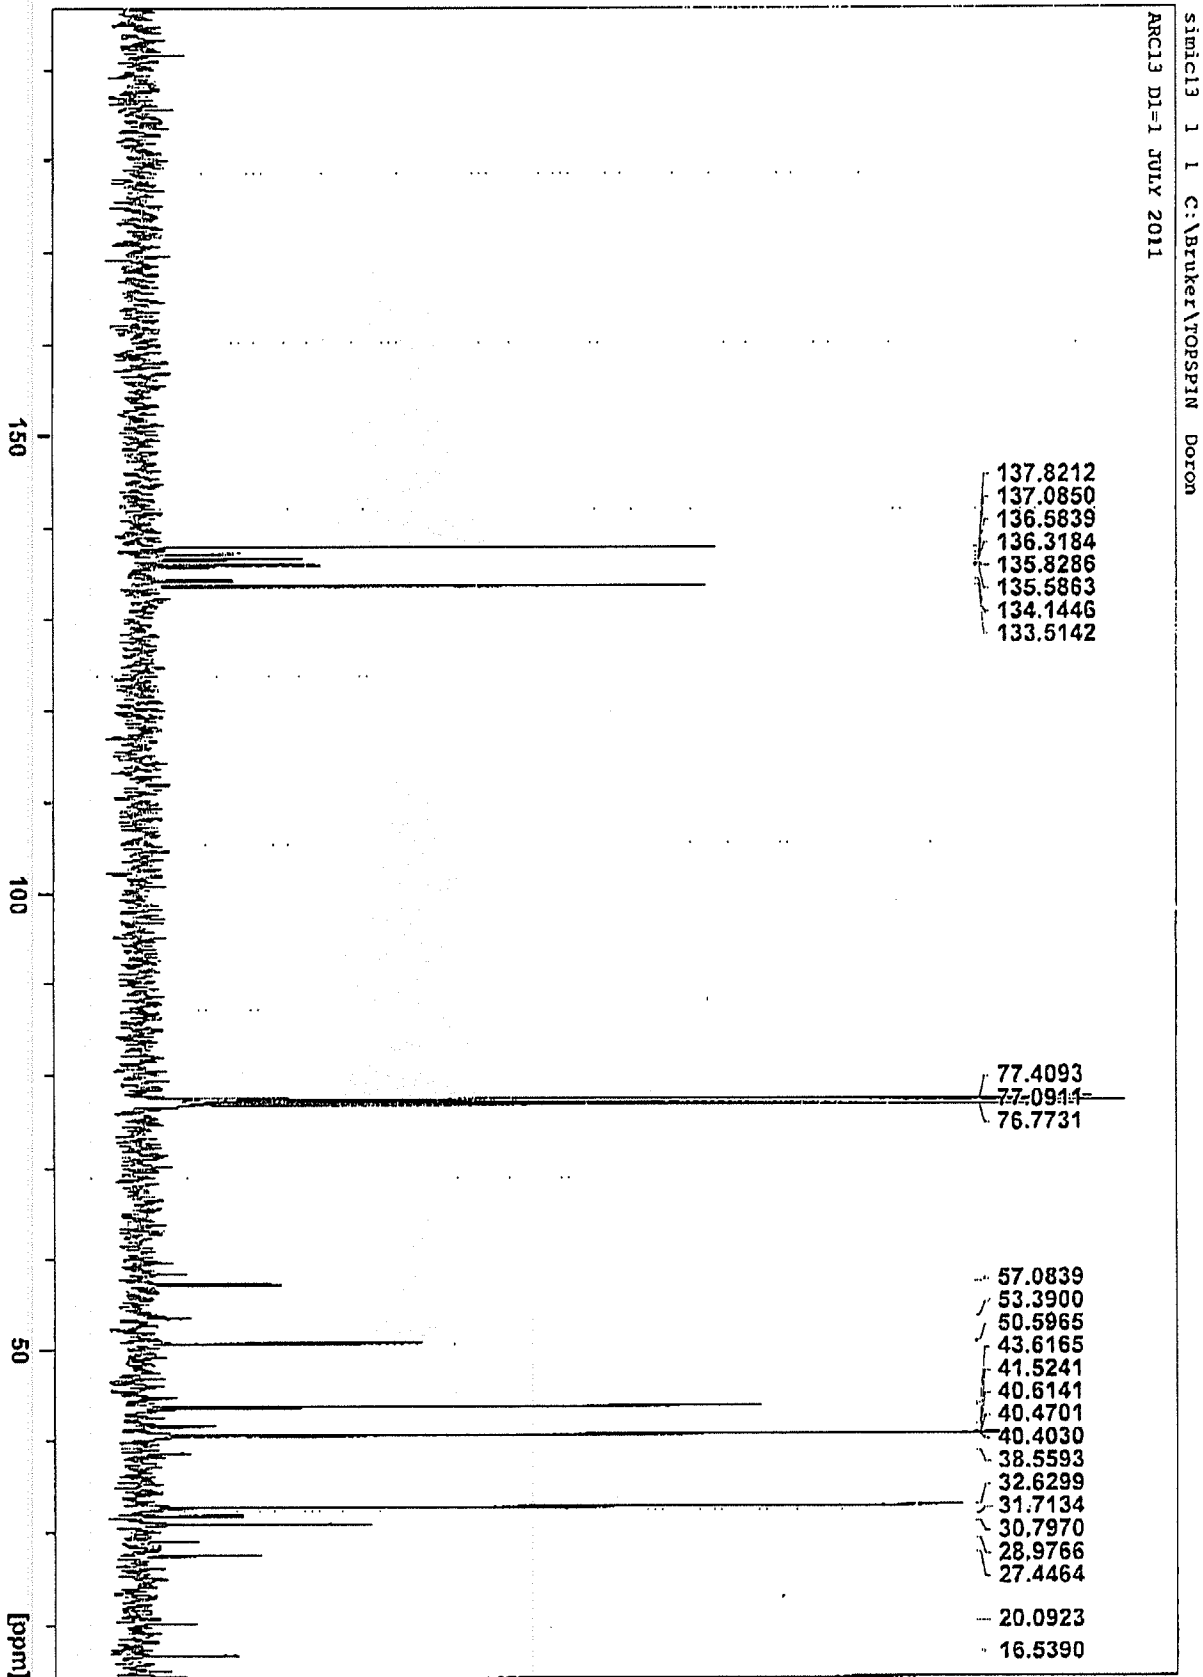

Supplement: f1 [file 9271285.f1.pdf]
